# Supplementary material for: Preparation and properties of semi-interpenetrating networks combined by thermoplastic polyurethane and a thermosetting elastomer
Source: Royal Society of Chemistry journal article supplement (doi:10.1039/c7nj03841k), 2018-01-01
Supplement: c7nj03841k1.pdf [file c7nj03841k1.pdf]

## Preparation and properties of semi-interpenetrating networks combined by thermoplastic polyurethane and thermosetting elastomer

Received 00th January 20xx,  
Accepted 00th January 20xx

DOI: 10.1039/x0xx00000x

Yajin Li,<sup>a</sup> Guoping Li<sup>a</sup>, Jie Li and Yunjun Luo<sup>\*a</sup>

www.rsc.org/

### Supplementary materials

#### Preparation of BPS

Aliphatic alkynes was synthesized by the esterification reaction of succinic acid with propargyl alcohol in toluene in the presence of toluene-4-sulfonic acid catalyst based on the reported procedure.<sup>1</sup>

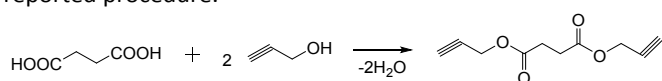

#### Scheme 1S. Synthesis route of BPS

In FTIR (Fig. 3), the peak at 3293 cm<sup>-1</sup> confirmed the presence of ≡CH, 2949 cm<sup>-1</sup> due to C-H stretching vibrations, 2139 cm<sup>-1</sup> due to triple bonded C-C and 1745 cm<sup>-1</sup> due to C=O in ester.

<sup>1</sup>H NMR (Fig. 1S) shows chemical shifts at 4.74 ppm corresponding to proton of CH<sub>2</sub>-O, 2.68 ppm due to -CH<sub>2</sub>-CH<sub>2</sub>-COO- and 2.47 ppm due to HC≡C-.

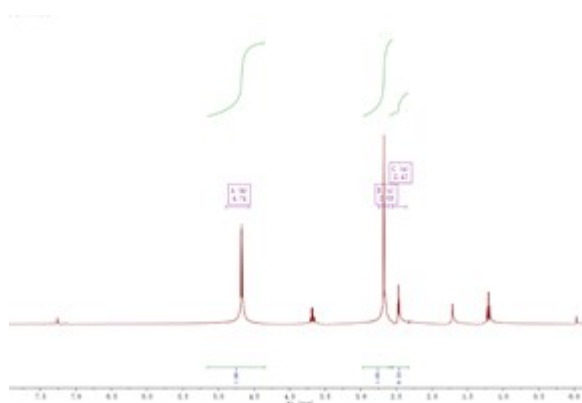

Fig. 1S <sup>1</sup>H NMR spectra of BPS.

### References

1. T. Keicher, W. Kuglstatler, S. Eisele, T. Wetzel and H. Krause, *Propellants, Explos. Pyrotech.*, 2009, **34**, 210-217.

<sup>a</sup> School of Materials Science & Engineering, Beijing Institute of Technology, Beijing 100081, PR China. E-mail: yjluo@bit.edu.cn; Fax: +86 010 68913698; Tel: +86 010 68913698

Electronic Supplementary Information (ESI) available: [details of any supplementary information available should be included here]. See DOI: 10.1039/x0xx00000x
